# Supplementary material for: RSV-specific airway resident memory CD8+ T cells and differential disease severity after experimental human infection
Source: Nat Commun. 2015 Dec 21;6:10224. doi: 10.1038/ncomms10224 (PMC4703893; doi:10.1038/ncomms10224)
Supplement: Supplementary Information — Supplementary Figures 1-7 and Supplementary Tables 1-8 [file ncomms10224-s1.pdf]

**Supplementary Figure 1: Viral load correlates with symptoms severity following RSV M37 infection.** Twenty-six subjects were infected with RSV M37. Viral load was measure by qPCR and symptoms assessed using self-reported symptom diaries. Cumulative scores were calculated using trapezoidal area under the curve (AUC).

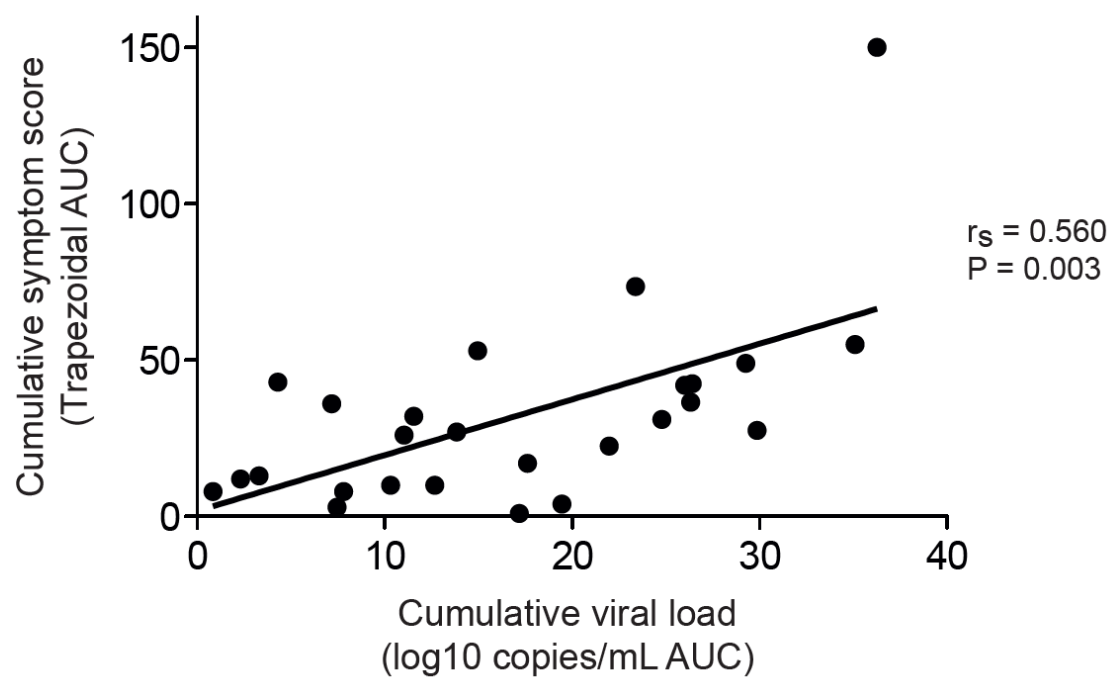

**Supplementary Figure 2: Fold change in RSV-specific CD8+ T cells following infection.** RSV-specific CD8+ T cells were enumerated by IFN- $\gamma$  ELISpot at baseline and 10 days post-infection. The fold-changes in total responses are shown for each HLA allele.

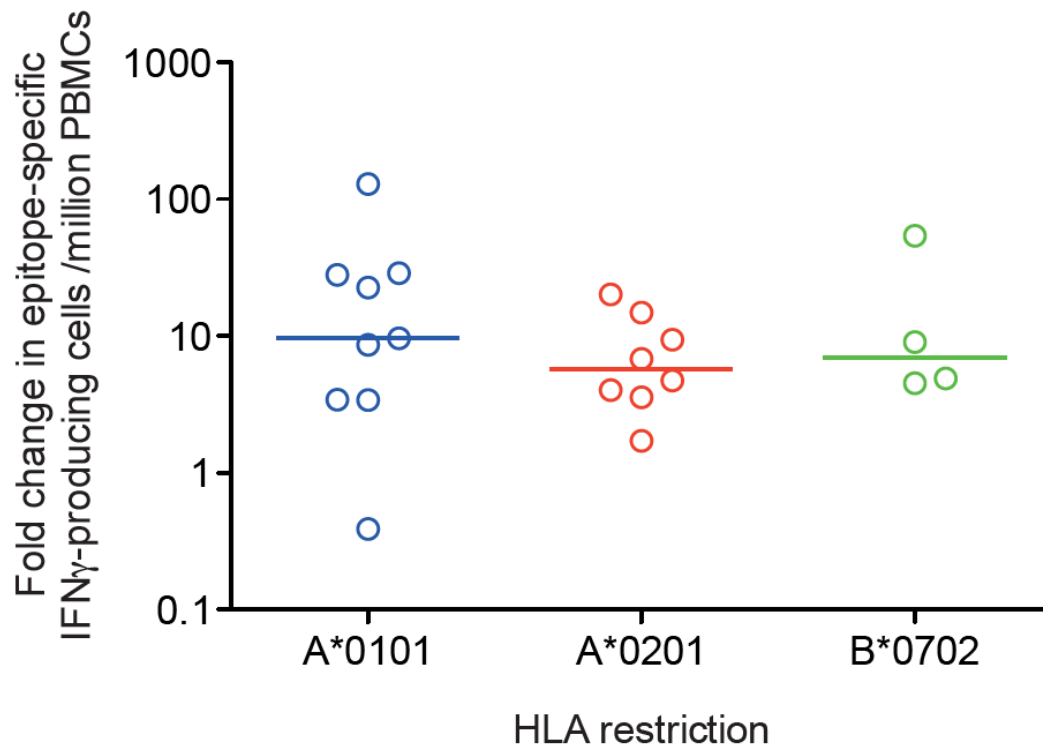

**Supplementary Figure 3: RSV-specific CD8<sup>+</sup> T cells downregulate CD62L on infection.** Epitope-specific CD8<sup>+</sup> T cells were co-stained with tetramer, anti-CD3, CD8 and CD62L. P-value for Wilcoxon matched pairs test is shown (\*\*\*) =  $P < 0.001$ ).

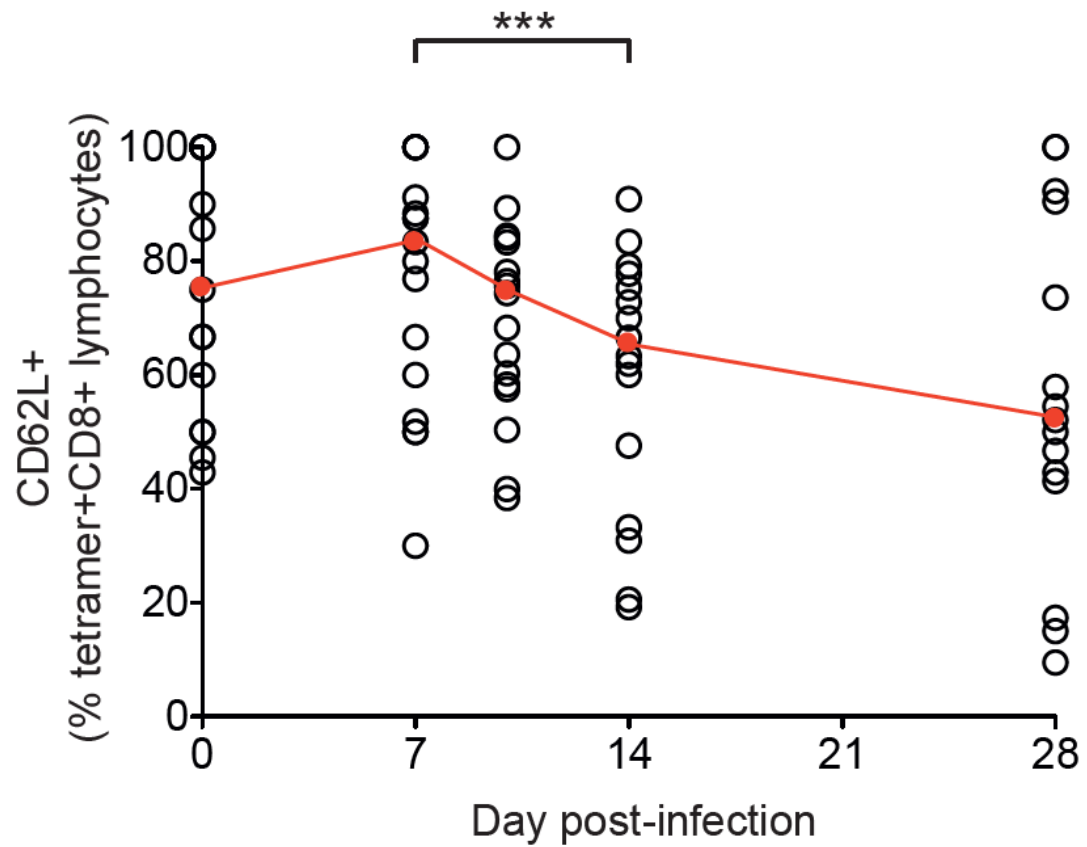

**Supplementary Figure 4: Pre-existing RSV-specific memory CD8+ T cells in peripheral blood do not correlate with protection against repeated infection or severity of disease.** RSV-specific CD8+ T cell responses to HLA-A\*01:01, A\*02:01 and B\*07:02-restricted epitopes were analysed by IFN- $\gamma$  ELISpot prior to inoculation. (a) The medians and P-values for Mann-Whitney tests (ns =  $P > 0.05$ ) are shown. (b) Non-linear regression was used to assess the association between baseline RSV-specific CD8+ cell frequencies and disease severity as measured by cumulative viral shedding (trapezoidal area under the curve). Spearman's rank correlation coefficient ( $r_s$ ) and P values are shown. (c) The correlation between peak and cumulative viral load and symptoms is shown.

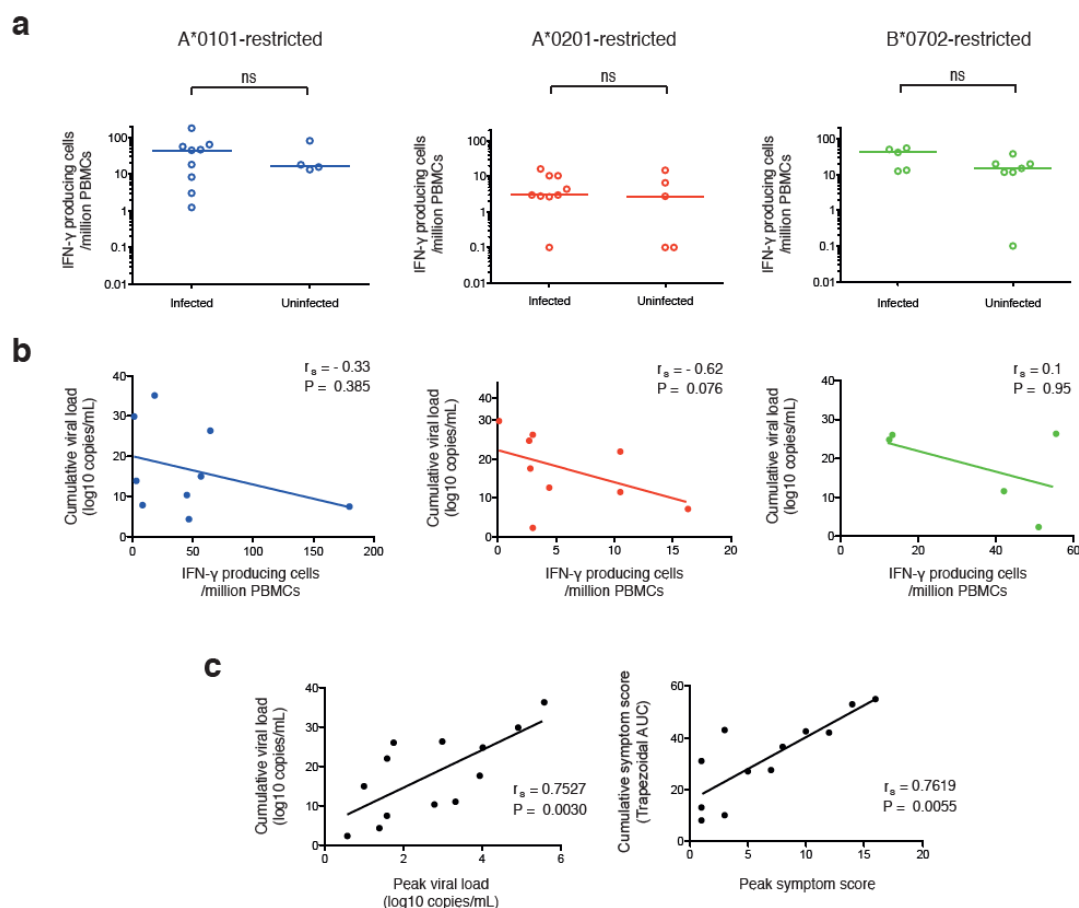

**Supplementary Figure 5: RSV-specific CD8+ T cells are significantly less polyfunctional than influenza-specific CD8+ T cells.** Resting PBMCs from individuals subsequently inoculated with RSV were stimulated with peptide epitopes (YLE, NPK and influenza M1-GIL) and subsequently intracellularly stained for IFN- $\gamma$ , TNF and IL-2 for analysis by flow cytometry. The frequencies of CD8+ T cells co-expressing all three cytokines as determined by Boolean gating are shown as percentages of total responding cells.

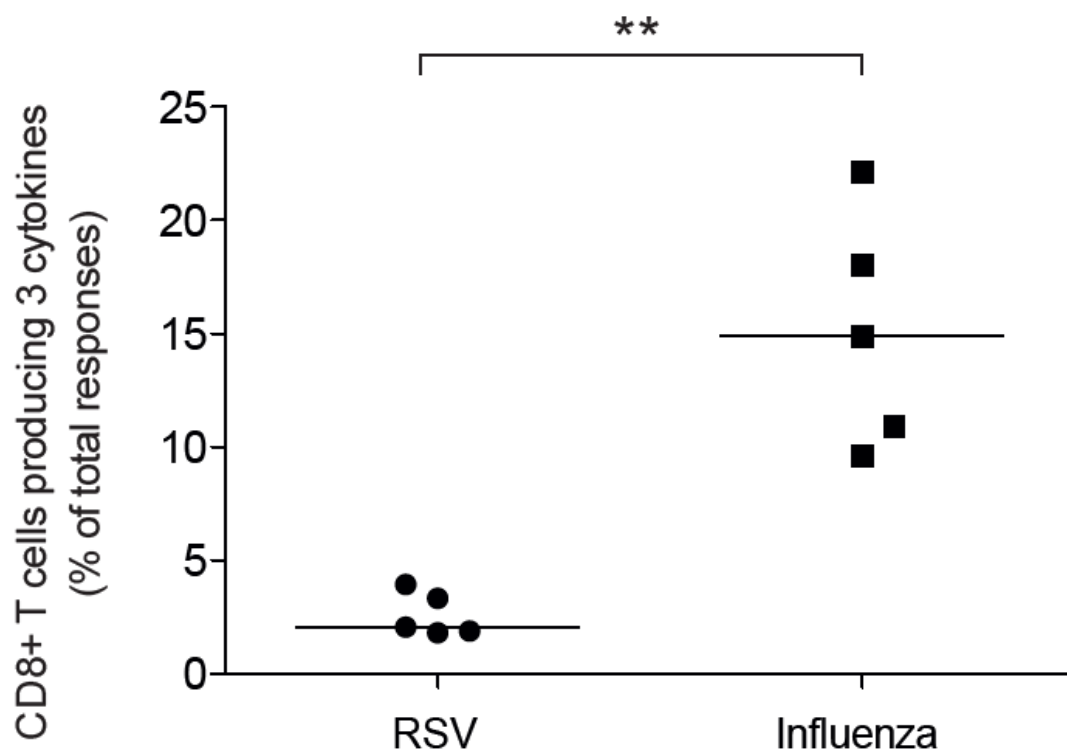

**Supplementary Figure 6: RSV-specific nasal IgA correlates with protection from infection but not disease severity.** RSV-specific IgA was analyzed by ELISA in nasal lavage fluid prior to experimental inoculation of volunteers. (a) The medians and P-value for the Mann-Whitney test ( $P=0.0316$ ) are shown for individuals with and without PCR-confirmed infection. (b) Non-linear regression was used to assess the association between baseline RSV-specific nasal IgA titers and disease severity as measured by cumulative symptoms and viral shedding (trapezoidal area under the curve). Spearman's rank correlation coefficient ( $r_s$ ) and P values are shown.

**a**

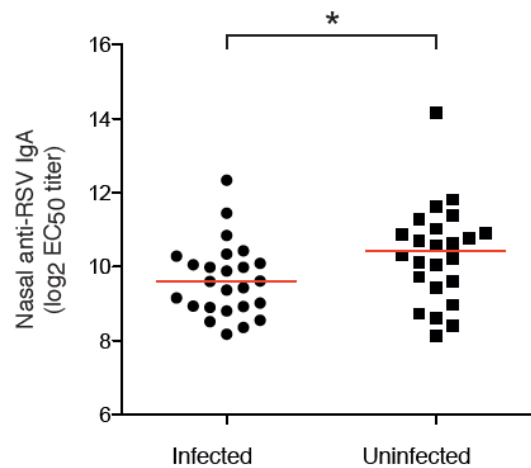

**b**

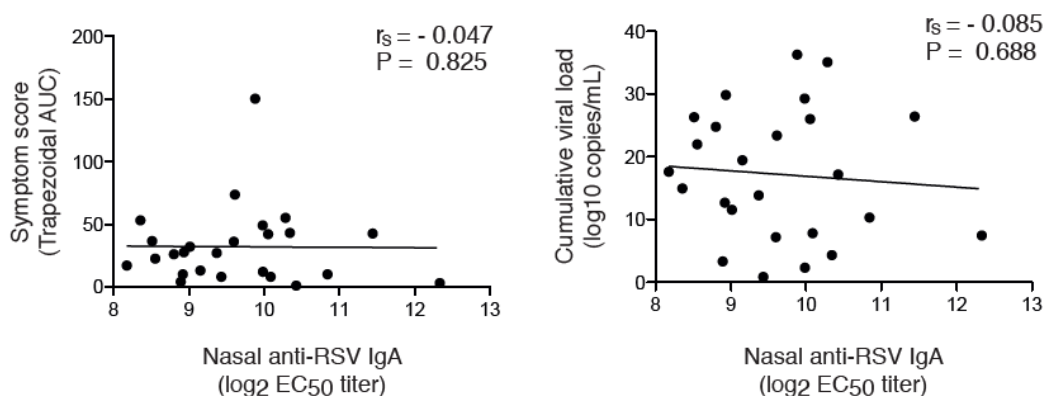

**Supplementary Figure 7: Pre-existing RSV-specific CD8+ T cell frequency in the lower airway correlates loosely with upper respiratory tract and systemic symptoms.** RSV-specific CD8+ T cell responses to HLA-A\*01:01, A\*02:01 and B\*07:02-restricted epitopes were analysed by tetramer staining prior to inoculation. Non-linear regression was used to assess the association between baseline RSV-specific CD8+ cell frequencies in BAL and disease severity in infected individuals as measured by cumulative (a) lower respiratory tract and (b) systemic symptoms. Spearman's rank correlation coefficient ( $r_s$ ) and P values are shown.

**a**

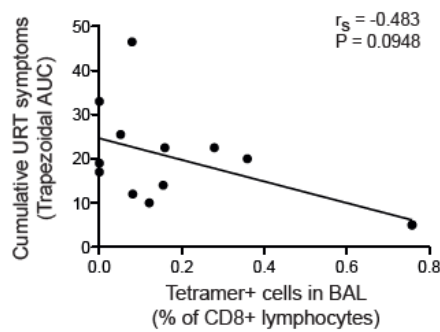

**b**

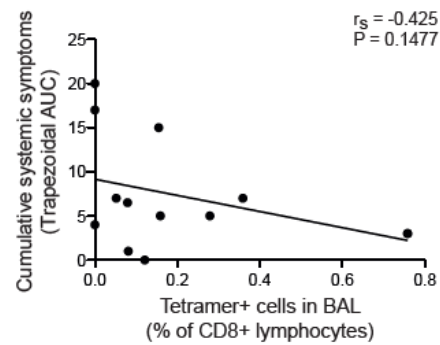

Supplementary Table 1: Demographic data summary of subjects inoculated with RSV

| RSV PCR | No | Age (Median & range) | % Male | A*0101 | A*0201 | B*0702 | A*0101 + A*0201 | A*0101 + B*0702 | A*0201 + B*0702 | All 3 HLA alleles | Ethnicity %                                         |
|---------|----|----------------------|--------|--------|--------|--------|-----------------|-----------------|-----------------|-------------------|-----------------------------------------------------|
| PCR+    | 26 | 20.5 (18 – 50)       | 58     | 4      | 5      | 2      | 1               | 1               | 4               | 2                 | White 84.6<br>Black 3.8<br>Chinese 7.7<br>Mixed 3.8 |
| PCR-    | 23 | 23 (18 – 39)         | 65     | 1      | 6      | 3      | 0               | 3               | 2               | 0                 | White 73.9<br>Black 17.3<br>Mixed 8.7               |

Supplementary Table 2: Summary of demographic and HLA typing data of volunteers inoculated with RSV and bronchoscope

| RSV PCR        | No. | Age (Median & range) | % Female | Ethnicity                             | HLA-A*0101 | HLA-A*0201 | HLA-B*0702 |
|----------------|-----|----------------------|----------|---------------------------------------|------------|------------|------------|
| Nasal PCR+     | 12  | 20 (18-50)           | 33.3     | White 92%<br>Black 0%<br>Chinese 8.3% | 8          | 3          | 6          |
| Bronchial PCR+ | 4   | 23 (20-27)           | 25       | White 100%                            | 0          | 3          | 3          |
| PCR-           | 8   | 23 (18-39)           | 16.7     | White 75%<br>Black 25%<br>Chinese 0%  | 2          | 5          | 6          |

Supplementary Table 3: Macroscopic appearance of airways at bronchoscopy

|                | % Baseline |          | % Day 7    |         | % Day 10 |            | % Day 28  |           |
|----------------|------------|----------|------------|---------|----------|------------|-----------|-----------|
|                | +          | ++       | +          | ++      | +        | ++         | +         | ++        |
| Nasal PCR+     | 0 (0/12)   | 0 (0/12) | 42.9 (3/7) | 0 (0/7) | 60 (3/5) | 40 (2/5)   | 10 (1/10) | 40 (4/10) |
| Bronchial PCR+ | 0 (0/4)    | 0 (0/4)  | 100 (1/1)  | 0 (0/1) | 0 (0/3)  | 33.3 (1/3) | 0 (0/3)   | 0 (0/3)   |
| PCR-           | 12.5 (1/8) | 0 (0/8)  | 0 (0/4)    | 0 (0/4) | 50 (2/4) | 25 (1/4)   | 0 (0/8)   | 0 (0/8)   |

+ = erythema only, ++ = erythema plus contact bleeding/friability

Supplementary Table 4: RSV antigen detection by immunohistochemistry

|                | RSV Antigen+ IHC |            |          |             |
|----------------|------------------|------------|----------|-------------|
|                | % Baseline       | % Day 7    | % Day 10 | % Day 28    |
| Nasal PCR+     | 0 (0/11)         | 33.3 (2/6) | 20 (1/5) | 33.3 (3/10) |
| Bronchial PCR+ | 0 (0/4)          | 0 (0/1)    | 0 (0/3)  | 25 (1/4)    |
| PCR-           | 0 (0/8)          | 0 (0/4)    | 0 (0/4)  | 9.1 (1/11)  |

Numbers indicate individuals with a staining score of 3-4 (on a 0-4 scale).

Supplementary Table 5: MHC class I restricted epitopes defined by epitope mapping of RSV Memphis 37

| <b>HLA restriction</b> | <b>Peptide ID</b> | <b>Position</b> | <b>Sequence</b> | <b>Conserved with RSV A2</b> | <b>Predicted affinity IC50 (nM)</b> | <b>Measured affinity IC50 (nM)</b> |
|------------------------|-------------------|-----------------|-----------------|------------------------------|-------------------------------------|------------------------------------|
| A*0101                 | NS1_2             | 115             | KLSDSTMTNY      |                              | 888                                 | 3835                               |
| A*0101                 | NS1_3             | 116             | LSDSTMTNY       |                              | 8                                   | 37                                 |
| A*0101                 | M_2               | 205             | VTDNKGAFKY      | +                            | 24                                  | 507                                |
| A*0101                 | M_7               | 228             | YLEKESIYY       | +                            | 24                                  | 120                                |
|                        |                   |                 |                 |                              |                                     |                                    |
| A*0201                 | NS2_3             | 60              | FLVNYEMKL       | +                            | 9                                   | 349                                |
|                        |                   |                 |                 |                              |                                     |                                    |
| B*0702                 | N_2               | 254             | QVMLRWGVL       | +                            | 142                                 | 93                                 |
| B*0702                 | N_8               | 305             | NPKASLLSL       | +                            | 25                                  | 148                                |
| B*0702                 | G_2               | 239             | KPNIRTTLL       |                              | 13                                  | 73                                 |
| B*0702                 | L_3               | 1352            | IPAYRTTNY       | +                            | 451                                 | 1745                               |

Supplementary Table 6: Antigen-specific CD8+ T cell responses by Interferon- $\gamma$  ELISpot following experimental human RSV infection

| Subject | A*01:01                                             |        |        | A*02:01 |        |        | B*07:02 |        |        |
|---------|-----------------------------------------------------|--------|--------|---------|--------|--------|---------|--------|--------|
|         | Interferon- $\gamma$ producing cells /million PBMCs |        |        |         |        |        |         |        |        |
|         | Day 0                                               | Day 10 | Day 28 | Day 0   | Day 10 | Day 28 | Day 0   | Day 10 | Day 28 |
| 1       | 65                                                  | 623    | 141    | 3       | 28     | 7      | 56      | 272    | 63     |
| 2       | 1                                                   | 159    | 67     | 0       | 6.67   | 10.67  | 5       | 0      | 37     |
| 3       | 8                                                   | 240    | 69     | N/A     | N/A    | N/A    | 7       | 0      | 38     |
| 4       | 180                                                 | 70     | 60     | N/A     | N/A    | N/A    | N/A     | N/A    | N/A    |
| 5       | 45                                                  | 389    | 38     | N/A     | N/A    | N/A    | N/A     | N/A    | N/A    |
| 6       | 47                                                  | 159    | 52     | N/A     | N/A    | N/A    | N/A     | N/A    | N/A    |
| 7       | 57                                                  | 194    | 7      | N/A     | N/A    | N/A    | N/A     | N/A    | N/A    |
| 8       | 18                                                  | 514    | 83     | N/A     | N/A    | N/A    | N/A     | N/A    | N/A    |
| 9       | 3                                                   | 68     | 17     | N/A     | N/A    | N/A    | N/A     | N/A    | N/A    |
| 10      | N/A                                                 | N/A    | N/A    | 4       | 18     | 16     | N/A     | N/A    | N/A    |
| 11      | N/A                                                 | N/A    | N/A    | 11      | 50     | 7      | N/A     | N/A    | N/A    |
| 12      | N/A                                                 | N/A    | N/A    | 3       | 42     | 20     | N/A     | N/A    | N/A    |
| 13      | N/A                                                 | N/A    | N/A    | 16      | 58     | 20     | N/A     | N/A    | N/A    |
| 14      | N/A                                                 | N/A    | N/A    | 3       | 20     | 28     | 51      | 397    | 142    |
| 15      | N/A                                                 | N/A    | N/A    | 3       | 54     | 5      | 13      | 678    | 117    |
| 16      | N/A                                                 | N/A    | N/A    | 10      | 18     | 5      | 42      | 190    | 52     |
| 17      | N/A                                                 | N/A    | N/A    | 0       | 0      | 0      | 13      | 121    | 13     |

Supplementary Table 7: Primers used for RSV quantification by PCR

| Primer                 | Sequence                           |
|------------------------|------------------------------------|
| RSV A N-gene forward   | 5'-CATCCAGCAAATACACCATCCA-3'       |
| RSV A N-gene reverse   | 5'-TTCTGCACATCATAATTAGGAGTATCAA-3' |
| RSV PAN A N-gene probe | 5'-FAM-CGGAGCACAGGAGAT-TAMRA-3'    |

Supplementary Table 8: Antibodies used for flow cytometry

| Antibody                             | Company     | Clone     | Catalogue number | Dilution |
|--------------------------------------|-------------|-----------|------------------|----------|
| CD3 PE CF594                         | BD          | UCHT1     | 562280           | 1:300    |
| CD4 APC H7                           | BD          | SK3       | 641398           | 1:150    |
| CD38 PE Cy7                          | BD          | HB7       | 335825           | 1:150    |
| Ki67 FITC                            | BD          | B56       | 556026           | 1:150    |
| Perforin FITC                        | BD          | δG9       | 556577           | 1:30     |
| Granzyme B V450                      | BD          | GB11      | 561151           | 1:60     |
| CD45RA FITC                          | BD          | HI100     | 555488           | 1:60     |
| CCR7 PE                              | BD          | 150503    | 560765           | 1:30     |
| CD27 V450                            | BD          | M-T271    | 560448           | 1:150    |
| CD28 PE Cy7                          | BD          | CD28.2    | 560684           | 1 :150   |
| CCR5 V450                            | BD          | 2D7/CCR5  | 562121           | 1:60     |
| CD62L PE                             | BD          | DREG-56   | 555544           | 1:60     |
| CD69 FITC                            | eBioscience | FN50      | 11-0699-42       | 1:60     |
| CD103 PE Cy7                         | eBioscience | B-Ly7     | 25-1038-42       | 1:150    |
| CD8 PE Cy5.5                         | eBioscience | RPA-T8    | 45-0088-42       | 1:300    |
| IFNγ APC                             | BD          | B27       | 554702           | 1:300    |
| TNF PE Cy7                           | BD          | MAb11     | 557647           | 1:60     |
| IL2 FITC                             | BD          | 5344.111  | 340448           | 1:30     |
| Anti-Human<br>CD28/CD49d<br>Purified | BD          | L293, L25 | 347690           | 1:50     |
